# Supplementary material for: Effect of bortezomib on the treatment of multiple myeloma: a systematic review protocol
Source: HighWire-hosted journal article supplement (doi:10.1136/bmjopen-2022-061808), 2022-06-01
Supplement: bmjopen-2022-061808supp001_data_supplement.pdf [file bmjopen-2022-061808supp001_data_supplement.pdf]

## SUPPLEMENTARY FILE

### Search Strategy

#### PubMed

#1 "Multiple Myeloma"[Mesh] OR (Myeloma)

#2 "Bortezomib"[Mesh] OR (Velcade)

\*#3 ("randomized controlled trial"[Publication Type] OR "controlled clinical trial"[Publication Type] OR "randomized"[Title/Abstract] OR "placebo"[Title/Abstract] OR "clinical trials as topic"[MeSH Terms:noexp] OR "randomly"[Title/Abstract] OR "trial"[Title]) NOT ("animals"[MeSH Terms] NOT "humans"[MeSH Terms])

\*\* # 4 (cohort[all] OR (control[all] AND study[all]) OR (control[tw] AND group\*[tw]) OR epidemiologic studies[mh] OR program[tw] OR clinical trial[pt] OR comparative stud\*[all] OR evaluation studies[all] OR statistics as topic[mh] OR survey\*[tw] OR follow-up\*[all] OR time factors[all] OR ci[tw]) NOT ((animals[mh:noexp] NOT humans[mh:noexp]) OR comment[pt] OR editorial[pt] OR review[pt] OR meta analysis[pt] OR case report[tw] OR consensus[mh] OR guideline[pt] OR history[sh])

\*Filter for RCT PubMed. sensitivity- and precision-maximizing version (2008 revision); PubMed format. <https://work.cochrane.org/pubmed>

\*\* Waffenschmidt S et al. Development and validation of study filters for identifying controlled non-randomized studies in PubMed and Ovid MEDLINE. Search filter with best sensitivity for controlled NRS (PubMed)

<https://doi.org/10.1002/jrsm.1425>

#1 AND #2 AND (#3 OR #4)

**Embase**

#1 ('bortezomib'/exp OR 'velcade'/exp) AND [embase]/lim

#2 ('mieloma múltiplo'/exp OU 'mieloma'/exp) AND [embase]/lim

\*#3 random\*:ab,ti OR placebo\*:de,ab,ti OR (double NEXT/1 blind\*):ab,ti

#4 'cohort analysis'/exp OR 'longitudinal study'/exp OR 'prospective study'/exp OR 'follow up'/exp

\*Wong SS, Wilczynski NL, Haynes RB. Developing optimal search strategies for detecting clinically sound treatment studies in EMBASE. *Journal of the Medical Library Association: JMLA*. 2006 Jan;94(1):41-7

#1 AND #2 AND (#3 OR #4)
